# Supplementary material
Source: MDPI journal article supplement (https://www.mdpi.com/2073-4395/11/5/1006)
Supplement: s1 [file s1]

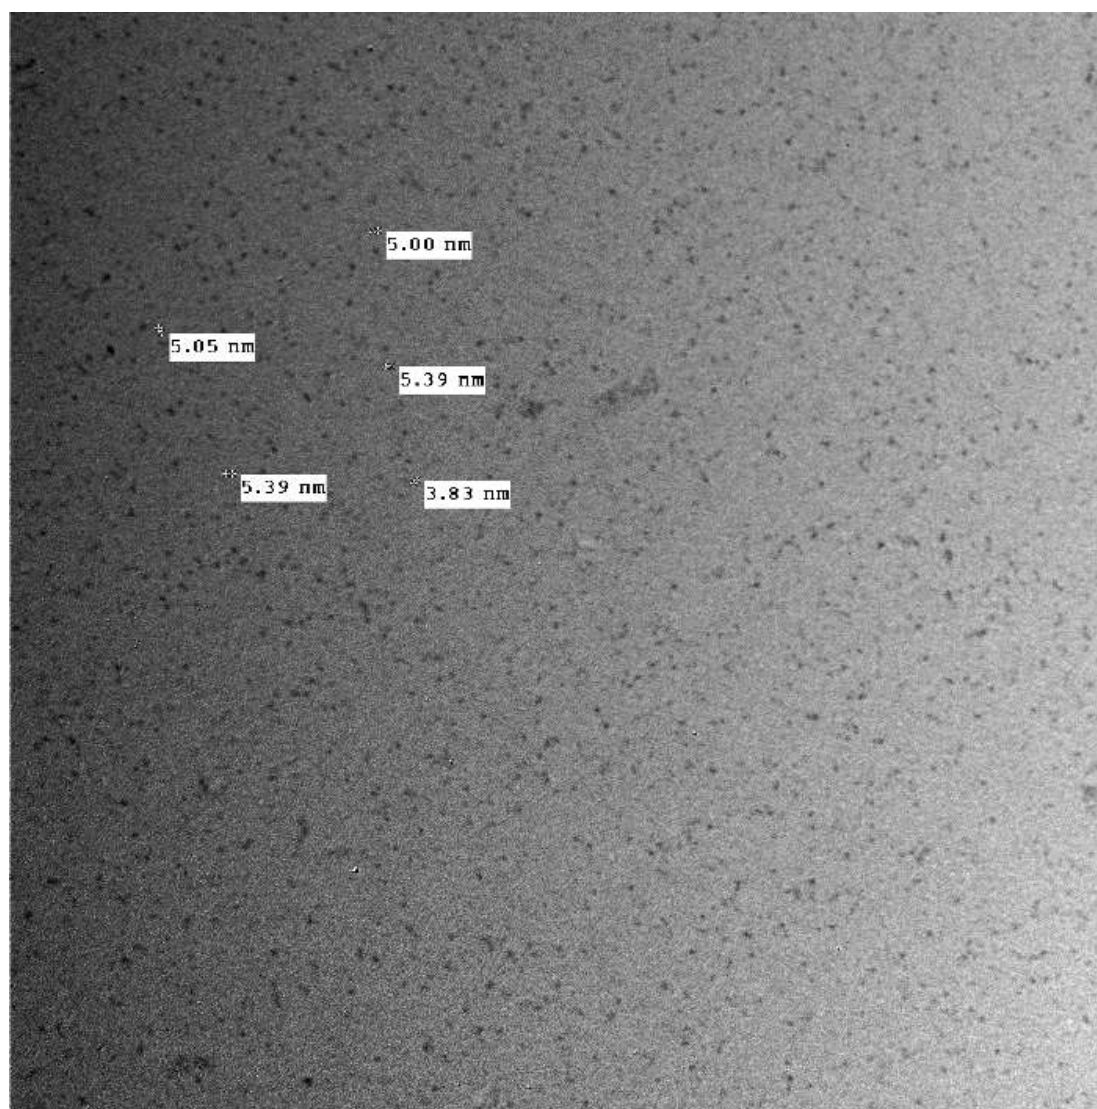

2.tif  
Print Mag: 210000x @ 211 nm  
TEM Mode: Imaging

100 nm  
HV=80.0kV  
Direct Mag: 100000x

**Figure S1.** Image from TEM microscopy showing copper oxide nanoparticles.
